# Supplementary material for: Micelle stability in water under a range of pressures and temperatures; do both have a common mechanism?
Source: Royal Society of Chemistry journal article supplement (doi:10.1039/c5ra09377e), 2015-01-01
Supplement: c5ra09377e1.pdf [file c5ra09377e1.pdf]

## Supplementary Information

### Micelle Stability in Water under Pressure and Temperature; Have both a Common Mechanism?

Yanis Ricardo Espinoza Silva and J. Raul Grigera

CEQUINOR, University of La Plata and CONICET. 47 y 115, B1900 La Plata, Argentina

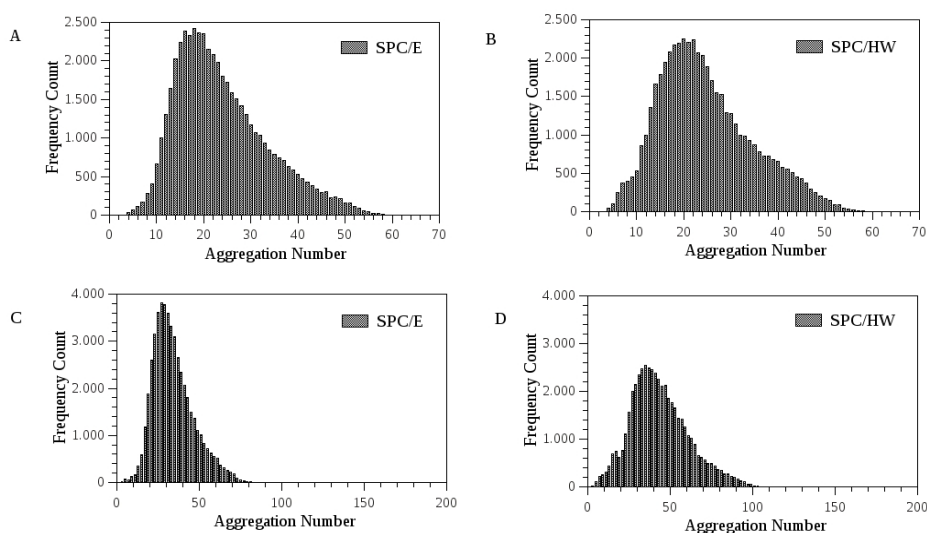

FS1. Distribution of aggregates in water and heavy water: panels A and B with 70 molecules of SDS; panels C and D 200 molecules of SDS

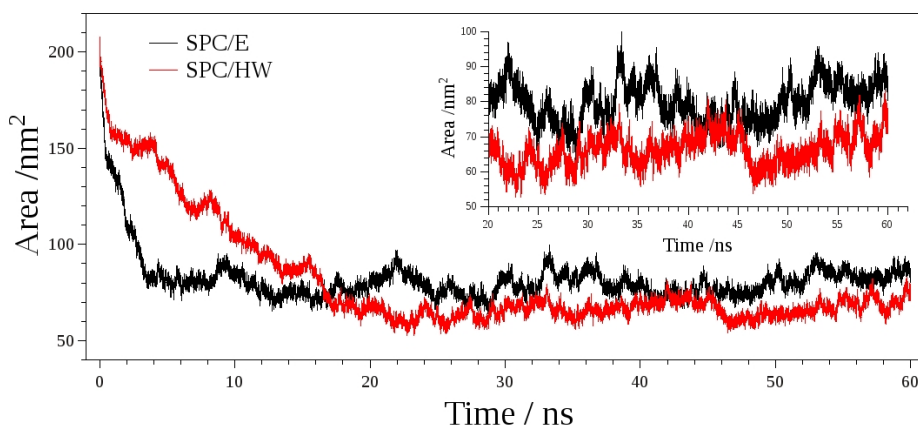

Fig.S2: Solvent Accessed Area (SAS) of a system of 70 SDS monomers in a l system of 70 SDS. The main figure and the insert shows Fig.S2

ÍCon las 2 figuras se demuestra de no hay diferencias entre los sistemas con el aumento del tamaño.

Fig.S2: System of
